# Supplementary material for: Clarity Plus™ digital PCR: A novel platform for absolute quantification of SARS-CoV-2
Source: bioRxiv or medRxiv preprint supplement (doi:10.1101/2021.05.30.21256718), 2021-06-01
Supplement: Supplementary file [file media-1.pdf]

## Supplementary Data

**Supplementary Table 1: SARS-CoV-2 RT-dPCR assay linearity study on Clarity Plus™ with three independent experimental runs in duplicates, using a series of expected N1 concentrations ranging from 0.02 to 30,000 copies/μl**

| Expected Concentration (Copies/μl) | Number of Positive Partition | Total Partition Number | Ratio <sup>a</sup> | Measured Concentration 1 <sup>b</sup> (Copies/μl) | Mean Measured Concentration 1 (Copies/μl) | Number of Positive Partition | Total Partition Number | Ratio <sup>a</sup> | Measured Concentration 2 <sup>b</sup> (Copies/μl) | Mean Measured Concentration 2 (Copies/μl) | Number of Positive Partition | Total Partition Number | Ratio <sup>a</sup> | Measured Concentration 3 <sup>b</sup> (Copies/μl) | Mean Measured Concentration 3 (Copies/μl) |
|------------------------------------|------------------------------|------------------------|--------------------|---------------------------------------------------|-------------------------------------------|------------------------------|------------------------|--------------------|---------------------------------------------------|-------------------------------------------|------------------------------|------------------------|--------------------|---------------------------------------------------|-------------------------------------------|
| 30000                              | 41002                        | 41064                  | 0.99849            | 20954.04                                          | 22272.25                                  | 40527                        | 40604                  | 0.99810            | 20218.76                                          | 21418.38                                  | 44561                        | 44627                  | 0.99852            | 21020.77                                          | 20045.35                                  |
|                                    | 44962                        | 44992                  | 0.99933            | 23590.46                                          |                                           | 41011                        | 41048                  | 0.99910            | 22618.00                                          |                                           | 46409                        | 46535                  | 0.99729            | 19069.93                                          |                                           |
| 20000                              | 42681                        | 42811                  | 0.99696            | 18700.05                                          | 18924.60                                  | 39414                        | 39502                  | 0.99777            | 19699.26                                          | 18887.03                                  | 46383                        | 46515                  | 0.99716            | 18918.48                                          | 18498.95                                  |
|                                    | 42281                        | 42393                  | 0.99736            | 19149.16                                          |                                           | 41084                        | 41236                  | 0.99631            | 18074.79                                          |                                           | 43850                        | 44012                  | 0.99632            | 18079.42                                          |                                           |
| 10000                              | 41225                        | 42829                  | 0.96255            | 10595.85                                          | 10502.90                                  | 44826                        | 46930                  | 0.95517            | 10015.54                                          | 10048.33                                  | 45598                        | 48068                  | 0.94861            | 9575.48                                           | 9935.72                                   |
|                                    | 43934                        | 45749                  | 0.96033            | 10409.95                                          |                                           | 43744                        | 45754                  | 0.95607            | 10081.11                                          |                                           | 43792                        | 45669                  | 0.95890            | 10295.95                                          |                                           |
| 2000                               | 21044                        | 50136                  | 0.41974            | 1755.73                                           | 1774.03                                   | 20235                        | 46456                  | 0.43557            | 1844.98                                           | 1827.02                                   | 21075                        | 46281                  | 0.45537            | 1960.16                                           | 1888.77                                   |
|                                    | 20350                        | 47738                  | 0.42629            | 1792.33                                           |                                           | 20274                        | 47231                  | 0.42925            | 1809.06                                           |                                           | 20340                        | 47223                  | 0.43072            | 1817.38                                           |                                           |
| 200                                | 2791                         | 45392                  | 0.06149            | 204.70                                            | 205.88                                    | 2758                         | 46164                  | 0.05974            | 198.72                                            | 198.63                                    | 2772                         | 47031                  | 0.05894            | 195.96                                            | 2204.38                                   |
|                                    | 2900                         | 46642                  | 0.06218            | 207.07                                            |                                           | 2838                         | 47545                  | 0.05969            | 198.54                                            |                                           | 2967                         | 46475                  | 0.06384            | 212.81                                            |                                           |
| 20                                 | 296                          | 43103                  | 0.00687            | 22.23                                             | 22.39                                     | 298                          | 43256                  | 0.00689            | 22.30                                             | 21.55                                     | 302                          | 42674                  | 0.00708            | 22.91                                             | 22.16                                     |
|                                    | 304                          | 43612                  | 0.00697            | 22.56                                             |                                           | 250                          | 38888                  | 0.00642            | 20.80                                             |                                           | 285                          | 43102                  | 0.00661            | 21.40                                             |                                           |
| 2                                  | 22                           | 42285                  | 0.00052            | 1.68                                              | 1.79                                      | 30                           | 45023                  | 0.00067            | 2.15                                              | 2.48                                      | 32                           | 49529                  | 0.00065            | 2.08                                              | 1.75                                      |
|                                    | 27                           | 45717                  | 0.00059            | 1.91                                              |                                           | 39                           | 44662                  | 0.00087            | 2.82                                              |                                           | 22                           | 50111                  | 0.00044            | 1.42                                              |                                           |
| 1                                  | 13                           | 43257                  | 0.00030            | 0.97                                              | 0.97                                      | 16                           | 45871                  | 0.00035            | 1.13                                              | 1.32                                      | 14                           | 42618                  | 0.00033            | 1.06                                              | 1.06                                      |
|                                    | 14                           | 46659                  | 0.00030            | 0.97                                              |                                           | 19                           | 40482                  | 0.00047            | 1.51                                              |                                           | 16                           | 48865                  | 0.00033            | 1.06                                              |                                           |
| 0.2                                | 3                            | 47065                  | 0.00006            | 0.21                                              | 0.31                                      | 1                            | 44159                  | 0.00002            | 0.07                                              | 0.11                                      | 3                            | 45494                  | 0.00007            | 0.21                                              | 0.21                                      |
|                                    | 6                            | 47428                  | 0.00013            | 0.41                                              |                                           | 2                            | 42523                  | 0.00005            | 0.15                                              |                                           | 3                            | 47429                  | 0.00006            | 0.20                                              |                                           |
| 0.02                               | 3                            | 45334                  | 0.00007            | 0.21                                              | 0.17                                      | 3                            | 41621                  | 0.00007            | 0.23                                              | 0.15                                      | 1                            | 45595                  | 0.00002            | 0.07                                              | 0.10                                      |
|                                    | 2                            | 46210                  | 0.00004            | 0.14                                              |                                           | 1                            | 44579                  | 0.00002            | 0.07                                              |                                           | 2                            | 49740                  | 0.00004            | 0.13                                              |                                           |

The results represent individual positive signals, total partition number, ratio, and measured concentration of two replicates within independent experimental runs.

<sup>a</sup>Ratio was calculated by the formula (Number of Positive Signals / Total Partition Number)

<sup>b</sup>Measured Concentration (Copies/μl) is calculated by the formula:  $-\ln(1 - \text{Ratio}) / \text{Partition Volume} \times 1000$ . Partition volume used is 0.31nL.

## Supplementary Data

**Supplementary Table 2: SARS-CoV-2 RT-dPCR assay linearity study on Clarity Plus™ with three independent experimental runs in duplicates, using a series of expected ORFlab concentrations ranging from 0.02 to 30,000 copies/μl**

| Expected Concentration (Copies/μl) | Number of Positive Partition | Total Partition Number | Ratio <sup>a</sup> | Measured Concentration 1 <sup>b</sup> (Copies/μl) | Mean Measured Concentration 1 (Copies/μl) | Number of Positive Partition | Total Partition Number | Ratio <sup>a</sup> | Measured Concentration 2 <sup>b</sup> (Copies/μl) | Mean Measured Concentration 2 (Copies/μl) | Number of Positive Partition | Total Partition Number | Ratio <sup>a</sup> | Measured Concentration 3 <sup>b</sup> (Copies/μl) | Mean Measured Concentration 3 (Copies/μl) |
|------------------------------------|------------------------------|------------------------|--------------------|---------------------------------------------------|-------------------------------------------|------------------------------|------------------------|--------------------|---------------------------------------------------|-------------------------------------------|------------------------------|------------------------|--------------------|---------------------------------------------------|-------------------------------------------|
| 30000                              | 41034                        | 41064                  | 0.99927            | 23295.77                                          | 20274.11                                  | 40577                        | 40604                  | 0.99934            | 23599.31                                          | 22866.27                                  | 44570                        | 44627                  | 0.99872            | 21493.69                                          | 21324.76                                  |
|                                    | 44778                        | 44992                  | 0.99524            | 17252.46                                          |                                           | 41005                        | 41048                  | 0.99895            | 22133.22                                          |                                           | 46469                        | 46535                  | 0.99858            | 21155.82                                          |                                           |
| 20000                              | 42566                        | 42811                  | 0.99428            | 16655.78                                          | 17067.08                                  | 39334                        | 39502                  | 0.99575            | 17613.36                                          | 17527.18                                  | 46195                        | 46515                  | 0.99312            | 16061.96                                          | 16326.37                                  |
|                                    | 42205                        | 42393                  | 0.99557            | 17478.38                                          |                                           | 41051                        | 41236                  | 0.99551            | 17441.00                                          |                                           | 43755                        | 44012                  | 0.99416            | 16590.78                                          |                                           |
| 10000                              | 40203                        | 42829                  | 0.93869            | 9005.66                                           | 9020.12                                   | 43757                        | 46930                  | 0.93239            | 8690.26                                           | 8711.51                                   | 44570                        | 48068                  | 0.92723            | 8452.98                                           | 8579.86                                   |
|                                    | 42969                        | 45749                  | 0.93923            | 9034.58                                           |                                           | 42701                        | 45754                  | 0.93327            | 8732.76                                           |                                           | 42597                        | 45669                  | 0.93273            | 8706.74                                           |                                           |
| 2000                               | 20021                        | 50136                  | 0.39933            | 1644.24                                           | 1662.72                                   | 19707                        | 46456                  | 0.42421            | 1780.67                                           | 1696.34                                   | 18825                        | 46281                  | 0.40675            | 1684.34                                           | 1684.34                                   |
|                                    | 19390                        | 47738                  | 0.40618            | 1681.20                                           |                                           | 18576                        | 47231                  | 0.39330            | 1612.01                                           |                                           | 19208                        | 47223                  | 0.40675            | 1684.33                                           |                                           |
| 200                                | 2419                         | 45392                  | 0.05329            | 176.66                                            | 175.54                                    | 2457                         | 46164                  | 0.05322            | 176.43                                            | 172.23                                    | 2191                         | 47031                  | 0.04659            | 153.89                                            | 158.37                                    |
|                                    | 2455                         | 46642                  | 0.05263            | 174.42                                            |                                           | 2413                         | 47545                  | 0.05075            | 168.02                                            |                                           | 2288                         | 46475                  | 0.04923            | 162.85                                            |                                           |
| 20                                 | 262                          | 43103                  | 0.00608            | 19.67                                             | 20.30                                     | 250                          | 43256                  | 0.00578            | 18.70                                             | 17.66                                     | 239                          | 42674                  | 0.00560            | 18.12                                             | 17.09                                     |
|                                    | 282                          | 43612                  | 0.00647            | 20.93                                             |                                           | 200                          | 38888                  | 0.00514            | 16.63                                             |                                           | 214                          | 43102                  | 0.00497            | 16.06                                             |                                           |
| 2                                  | 17                           | 42285                  | 0.00040            | 1.30                                              | 1.43                                      | 29                           | 45023                  | 0.00064            | 2.08                                              | 2.05                                      | 17                           | 49529                  | 0.00034            | 1.11                                              | 1.30                                      |
|                                    | 22                           | 45717                  | 0.00048            | 1.55                                              |                                           | 28                           | 44662                  | 0.00063            | 2.02                                              |                                           | 23                           | 50111                  | 0.00046            | 1.48                                              |                                           |
| 1                                  | 16                           | 43257                  | 0.00037            | 1.19                                              | 0.97                                      | 6                            | 45871                  | 0.00013            | 0.42                                              | 0.81                                      | 13                           | 42618                  | 0.00031            | 0.98                                              | 1.09                                      |
|                                    | 11                           | 46659                  | 0.00024            | 0.76                                              |                                           | 15                           | 40482                  | 0.00037            | 1.20                                              |                                           | 18                           | 48865                  | 0.00037            | 1.19                                              |                                           |
| 0.2                                | 3                            | 47065                  | 0.00006            | 0.21                                              | 0.28                                      | 1                            | 44159                  | 0.00002            | 0.07                                              | 0.19                                      | 2                            | 45494                  | 0.00004            | 0.14                                              | 0.58                                      |
|                                    | 5                            | 47428                  | 0.00011            | 0.34                                              |                                           | 4                            | 42523                  | 0.00009            | 0.30                                              |                                           | 15                           | 47429                  | 0.00032            | 1.02                                              |                                           |
| 0.02                               | 1                            | 45334                  | 0.00002            | 0.07                                              | 0.18                                      | 2                            | 41621                  | 0.00005            | 0.16                                              | 0.19                                      | 6                            | 45595                  | 0.00013            | 0.42                                              | 0.21                                      |
|                                    | 4                            | 46210                  | 0.00009            | 0.28                                              |                                           | 3                            | 44579                  | 0.00007            | 0.22                                              |                                           | 0                            | 49740                  | 0.00000            | 0.00                                              |                                           |

The results represent individual positive signals, total partition number, ratio, and measured concentration of two replicates within independent experimental runs.

<sup>a</sup>Ratio was calculated by the formula (Number of Positive Signals / Total Partition Number)

<sup>b</sup>Measured Concentration (Copies/μl) is calculated by the formula:  $-\ln(1 - \text{Ratio}) / \text{Partition Volume} \times 1000$ . Partition volume used is 0.31nL.

## Supplementary Data

**Supplementary Table 3:** Limit of Quantification (LOQ) in SARS-CoV-2 RT-dPCR assay quantified using Clarity Plus™. Three independent runs in duplicates were performed with a series of expected N1 concentrations ranging from 0.125 to 1 Copies/μl

| Expected Concentration (Copies/μl) | Number of Positive Partition | Total Partition Number | Ratio <sup>a</sup> | Measured Concentration 1 <sup>b</sup> (Copies/μl) | Number of Positive Partition | Total Partition Number | Ratio <sup>a</sup> | Measured Concentration 2 <sup>b</sup> (Copies/μl) | Number of Positive Partition | Total Partition Number | Ratio <sup>a</sup> | Measured Concentration 3 <sup>b</sup> (Copies/μl) |
|------------------------------------|------------------------------|------------------------|--------------------|---------------------------------------------------|------------------------------|------------------------|--------------------|---------------------------------------------------|------------------------------|------------------------|--------------------|---------------------------------------------------|
| 1                                  | 10                           | 41267                  | 0.00024            | 0.78                                              | 12                           | 39938                  | 0.00030            | 0.97                                              | 12                           | 43297                  | 0.00028            | 0.89                                              |
|                                    | 16                           | 44536                  | 0.00036            | 1.16                                              | 14                           | 41669                  | 0.00034            | 1.08                                              | 15                           | 47542                  | 0.00032            | 1.02                                              |
| 0.5                                | 6                            | 41436                  | 0.00014            | 0.47                                              | 7                            | 45073                  | 0.00016            | 0.50                                              | 7                            | 43668                  | 0.00016            | 0.52                                              |
|                                    | 7                            | 44060                  | 0.00016            | 0.51                                              | 7                            | 43235                  | 0.00016            | 0.52                                              | 6                            | 44058                  | 0.00014            | 0.44                                              |
| 0.25                               | 4                            | 46397                  | 0.00009            | 0.28                                              | 1                            | 41806                  | 0.00002            | 0.08                                              | 5                            | 43130                  | 0.00012            | 0.37                                              |
|                                    | 3                            | 42857                  | 0.00007            | 0.23                                              | 2                            | 43240                  | 0.00005            | 0.15                                              | 1                            | 44437                  | 0.00002            | 0.07                                              |
| 0.125                              | 3                            | 42761                  | 0.00007            | 0.23                                              | 3                            | 42145                  | 0.00007            | 0.23                                              | 3                            | 44287                  | 0.00007            | 0.22                                              |
|                                    | 3                            | 43267                  | 0.00007            | 0.22                                              | 2                            | 41699                  | 0.00005            | 0.15                                              | 2                            | 44112                  | 0.00005            | 0.15                                              |

The results represent individual positive signals, total partition number, ratio, and measured concentration of two replicates within independent experimental runs.

<sup>a</sup>Ratio was calculated by the formula (Number of Positive Signals / Total Partition Number)

<sup>b</sup>Measured Concentration (Copies/μl) is calculated by the formula:  $-\ln(1 - \text{Ratio}) / \text{Partition Volume} \times 1000$ . Partition volume used is 0.31nL

## Supplementary Data

**Supplementary Table 4:** Limit of Quantification (LOQ) in SARS-CoV-2 RT-dPCR assay quantified using Clarity Plus™. Three independent runs in duplicates were performed with a series of expected ORF1ab concentrations ranging from 0.125 to 1 Copies/μl

| Expected Concentration (Copies/μl) | Number of Positive Partition | Total Partition Number | Ratio <sup>a</sup> | Measured Concentration 1 <sup>b</sup> (Copies/μl) | Number of Positive Partition | Total Partition Number | Ratio <sup>a</sup> | Measured Concentration 2 <sup>b</sup> (Copies/μl) | Number of Positive Partition | Total Partition Number | Ratio <sup>a</sup> | Measured Concentration 3 <sup>b</sup> (Copies/μl) |
|------------------------------------|------------------------------|------------------------|--------------------|---------------------------------------------------|------------------------------|------------------------|--------------------|---------------------------------------------------|------------------------------|------------------------|--------------------|---------------------------------------------------|
| 1                                  | 15                           | 41267                  | 0.00036            | 1.17                                              | 8                            | 39938                  | 0.00020            | 0.65                                              | 17                           | 43297                  | 0.00039            | 1.27                                              |
|                                    | 10                           | 44536                  | 0.00022            | 0.72                                              | 15                           | 41669                  | 0.00036            | 1.16                                              | 5                            | 47542                  | 0.00011            | 0.34                                              |
| 0.5                                | 5                            | 41436                  | 0.00012            | 0.39                                              | 6                            | 45073                  | 0.00013            | 0.43                                              | 8                            | 43668                  | 0.00018            | 0.59                                              |
|                                    | 7                            | 44060                  | 0.00016            | 0.51                                              | 11                           | 43235                  | 0.00025            | 0.82                                              | 0                            | 44058                  | 0.00000            | 0.00                                              |
| 0.25                               | 4                            | 46397                  | 0.00009            | 0.28                                              | 2                            | 41806                  | 0.00005            | 0.15                                              | 2                            | 43130                  | 0.00005            | 0.15                                              |
|                                    | 8                            | 42857                  | 0.00019            | 0.60                                              | 2                            | 43240                  | 0.00005            | 0.15                                              | 5                            | 44437                  | 0.00011            | 0.36                                              |
| 0.125                              | 2                            | 42761                  | 0.00005            | 0.15                                              | 2                            | 42145                  | 0.00005            | 0.15                                              | 4                            | 44287                  | 0.00009            | 0.29                                              |
|                                    | 5                            | 43267                  | 0.00012            | 0.37                                              | 4                            | 41699                  | 0.00010            | 0.31                                              | 7                            | 44112                  | 0.00016            | 0.51                                              |

The results represent individual positive signals, total partition number, ratio, and measured concentration of two replicates within independent experimental runs.

<sup>a</sup>Ratio was calculated by the formula (Number of Positive Signals / Total Partition Number)

<sup>b</sup>Measured Concentration (Copies/μl) is calculated by the formula:  $-\ln(1 - \text{Ratio}) / \text{Partition Volume} \times 1000$ . Partition volume used is 0.31nL
